# Supplementary material for: Synthesis of bis[palladium(ii)] and bis[platinum(ii)] complexes containing chiral, linear quadridentate ligands with a P2N2 donor set
Source: Royal Society of Chemistry journal article supplement (doi:10.1039/b106861j), 2002-01-01
Supplement: b106861j.doc [file b106861j.doc]

**SUPPLEMENTARY MATERIAL**

**Synthesis of bis[palladium(II)] and bis[platinum(II)] complexes containing chiral, linear quadridentate ligands with a P2N2 donor set**

**Justine Bennett,a A. David Rae,b Geoffrey Salem,*a Natalie C. Ward,a Paul Waring,a Kerri Wellsa and Anthony C. Willisb**

aChemistry Department, The Faculties, Australian National University, Canberra, A. C. T. 0200, Australia

bResearch School of Chemistry, Australian National University, Canberra, A. C. T. 0200, Australia

**Experimental**

**(RP*,RP*)- and (RP*,SP*)-1,4-bis[(2-aminophenyl)phenylphosphino]butane, (RP*,RP*)- and (RP*,SP*)-2.** Prepared in a similar manner to (RP*,RP*)- and (RP*,SP*)-**1** except using sodium (0.808 g, 0.0351 mol), ()-(2-aminophenyl)phenylphosphine (7.07 g, 0.0351 mol) and 1,4-dibromobutane (3.79 g, 0.0176 mol) to give a white crystalline product (6.74 g, 84%). 1H NMR (CDCl3):  1.59 (m, 4 H, CC*H*2C), 2.04 (m, 4 H, PC*H*2), 4.11 (bs, 4 H, NH2), 6.64-7.35 (m, 18 H, aromatics). 31P-{1H} NMR (CDCl3):  -34.0 (s, 2 P). *m/z*: 456, (M+); 379, (M-C6H5)+; 364, (M-C6H5NH2)+; 256, (M-C6H5PC6H4NH2)+.

**(RP*,RP*)- and (RP*,SP*)-1,5-bis[(2-aminophenyl)phenylphosphino]pentane, (RP*,RP*)- and (RP*,SP*)-3.** Prepared in a similar manner to (RP*,RP*)- and (RP*,SP*)-**1** except using sodium (0.930 g, 0.0404 mol), ()-(2-aminophenyl)phenylphosphine (7.64 g, 0.0379 mol) and 1,5-dibromopentane (4.37 g, 0.0190 mol) to give a white crystalline product (2.50 g, 28%). 1H NMR (C6D6):  1.40 (m, 6 H, CC*H*2C), 1.90 (m, 4 H, PC*H*2), 3.81 (bs, 4 H, NH2), 6.28-7.70 (m, 18 H, aromatics). 31P-{1H} NMR (C6D6):  -34.0 (s, 2 P). *m/z*: 470, (M+); 393, (M-C6H5)+; 378, (M-C6H5NH2)+; 270, (M-C6H5PC6H4NH2)+.

**(RP*,RP*)- and (RP*,SP*)-1,6-bis[(2-aminophenyl)phenylphosphino]hexane, (RP*,RP*)- and (RP*,SP*)-4.** Prepared in a similar manner to (RP*,RP*)- and (RP*,SP*)-**1** except using sodium (0.514 g, 0.0224 mol), ()-(2-aminophenyl)phenylphosphine (4.50 g, 0.0224 mol) and 1,6-dibromohexane (2.73 g, 0.0112 mol) to give a white crystalline product (4.18 g, 78%). 1H NMR (CDCl3):  1.44 (m, 8 H, CC*H*2C), 2.03 (m, 4 H, PC*H*2), 4.10 (bs, 4 H, NH2), 6.64-7.35 (m, 18 H, aromatics). 31P-{1H} NMR (CDCl3):  -33.8 (s, 2 P), -33.9 (s, 2 P). *m/z*: 484, (M+); 407, (M-C6H5)+; 392, (M-C6H5NH2)+; 284, (M-C6H5PC6H4NH2)+.

**Formation and separation of the internally diastereomeric complexes [SP-4-2-(RP*,RP*)]- and [SP-4-2-(RP*,SP*)]-{-1,4-bis[(2-aminophenyl)phenylphosphino]- butane}{bis[2-(dimethylaminomethyl)phenyl-C1,N]}dipalladium(II) hexafluoro-phosphate-hydrate (1/1), [{Pd(2-C6H4CH2NMe2)}2{-(RP*,RP*)-2}](PF6)2 and [{Pd(2-C6H4CH2NMe2)}2{-(RP*,SP*)-2}](PF6)2.** Prepared in a similar manner to [{Pd(2-C6H4CH2NMe2)}2(-L)](PF6)2 [where L = (RP*,RP*)- or (RP*,SP*)-**1**] except using **8** (3.82 g, 6.92 mmol) and (RP*,RP*)- and (RP*,SP*)-**2** (3.16 g, 6.92 mmol). The addition of one equivalent of aqueous ammonium hexafluorophosphate gave a *ca*. 6 : 1 mixture of [{Pd(2-C6H4CH2NMe2)}2{-(RP*,RP*)-**2**}](PF6)2 and [{Pd(2-C6H4CH2NMe2)}2{-(RP*,SP*)-**2**}](PF6)2 (4.27 g, 50%). The diastereomeric mixture was dissolved in dichloromethane (20 cm3), methanol (100 cm3) was added and the volume of the solution reduced by *ca* 50% to give fine white needles of [{Pd(2-C6H4CH2NMe2)}2{-(RP*,RP*)-**2**}](PF6)2. The complex was isolated by filtration, washed with methanol (5 cm3) and dried *in vacuo* (3.48 g, 81%), mp 254 C (decomp.). (Found: C, 44.6; H, 5.0; N, 4.6. Calc. for C46H54F12N4P4Pd2.H2O: C, 44.3; H, 4.5; N, 4.5%). 1H NMR [(CD3)2CO]:  1.47 (m, 2 H, CC*H*HC), 1.97 (m, 2 H, CCH*H*C), 2.41 (m, 2 H, PC*H*H), 2.78 (m, 2 H, PCH*H*), 2.93 (bs, 6 H, N*Me*), 3.04 (bs, 6 H, N*Me*), 3.78, 4.48 (AB part of ABX m, 4 H, 2*J*AB 14 Hz, 4*J*AX 3 Hz, 4*J*BX ~ 0 Hz, C*H*2NMe2), 6.22-8.01 (m, 30 H, aromatics & N*H*2). 31P-{1H} NMR [(CD3)2CO]:  39.9 (s, 2 P). The addition of excess aqueous ammonium hexafluorophosphate to the filtrate from the isolation of the *ca*. 6:1 mixture of [{Pd(2-C6H4CH2NMe2)}2{-(RP*,RP*)-**2**}](PF6)2 and [{Pd(2-C6H4CH2NMe2)}2{-(RP*,SP*)-**2**}](PF6)2 gave a precipitate enriched in the latter (3.33 g, 39%). Fractional crystallization of the product (3.00 g, 2.44 mmol) from hot methanol gave diastereomerically pure [{Pd(2-C6H4CH2NMe2)}2{-(RP*,SP*)-**2**}](PF6)2 (1.80 g, 60%), mp 240 C (decomp.). (Found: C, 44.5; H, 4.8; N, 4.4. Calc. for C46H54F12N4P4Pd2.H2O: C, 44.4; H, 4.5; N, 4.5%). 1H NMR [(CD3)2CO]:  1.73 (m, 2 H, CC*H*HC), 1.87 (m, 2 H, CCH*H*C), 2.42 (m, 2 H, PC*H*H), 2.68 (m, 2 H, PCH*H*), 2.84 (s, 2 H, H2O), 2.91 (bs, 6H, N*Me*), 3.01 (bs, 6H, N*Me*), 3.74, 4.91 (bAB q, 2*J*AB 15 Hz, 2 H, C*H*2NMe2), 6.32-7.95 (m, 30 H, aromatics & N*H*2). 31P-{1H} NMR [(CD3)2CO]:  38.2 (s, 2 P).

**Formation and separation of the internally diastereomeric complexes [SP-4-2-(RP*,RP*)]- and [SP-4-2-(RP*,SP*)]-{-1,5-bis[(2-aminophenyl)phenylphosphino]- pentane}{bis[2-(dimethylaminomethyl)phenyl-C1,N]}dipalladium(II) hexafluoro-phosphate, [{Pd(2-C6H4CH2NMe2)}2{-(RP*,RP*)-3}](PF6)2 and [{Pd(2-C6H4CH2NMe2)}2{-(RP*,SP*)-3}](PF6)2.** Prepared in a similar manner to [{Pd(2-C6H4CH2NMe2)}2(-L)](PF6)2 [where L = (RP*,RP*)- or (RP*,SP*)-**1**] except using **8** (2.18 g, 3.94 mmol) and (RP*,RP*)- and (RP*,SP*)-**3** (1.86 g, 3.94 mmol). The addition of excess aqueous ammonium hexafluorophosphate gave a *ca.* 1:1 diastereomeric mixture of [{Pd(2-C6H4CH2NMe2)}2{-(RP*,RP*)-**3**}](PF6)2 and [{Pd(2-C6H4CH2NMe2)}2{-(RP*,SP*)-**3**}](PF6)2 (4.90 g, 80%). 31P-{1H} NMR [(CD3)2CO]:  39.3 (s, 2 P), 39.5 (s, 2 P). The diastereomeric mixture was dissolved in dichloromethane (10 cm3), methanol (50 cm3) was added and the volume of the solution reduced by *ca* 50% to give fine white needles of [{Pd(2-C6H4CH2NMe2)}2{-(RP*,RP*)-**3**}](PF6)2. The complex was isolated by filtration, washed with methanol (5 cm3) and dried *in vacuo* (1.81 g, 74%). 1H NMR [(CD3)2CO]:  1.35 (m, 2 H, CC*H*2C), 1.55 (m, 4 H, CC*H*2C), 2.45 (m, 2 H, PC*H*H), 2.72 (m, 2 H, PCH*H*), 2.95 (bs, 6 H, N*Me*), 3.03 (d, 6 H, 3*J*PH 2.4 Hz, N*Me*), 3.99, 4.25 (AB part of ABX m, 4 H, 2*J*AB 14 Hz, 4*J*AX 3 Hz, 4*J*BX ~ 0 Hz, C*H*2NMe2), 6.68-8.12 (m, 30 H, aromatics & N*H*2). 31P-{1H} NMR [(CD3)2CO]:  39.5 (s, 2 P). The mother liquor from the isolation of [{Pd(2-C6H4CH2NMe2)}2{-(RP*,RP*)-**3**}](PF6)2 could not be further separated by fractional crystallization.

**Formation and separation of the internally diastereomeric complexes [SP-4-2-(RP*,RP*)]- and [SP-4-2-(RP*,SP*)]-{-1,6-bis[(2-aminophenyl)phenylphosphino]- hexane}{bis[2-(dimethylaminomethyl)phenyl-C1,N]}dipalladium(II) hexafluoro-phosphate, [{Pd(2-C6H4CH2NMe2)}2{-(RP*,RP*)-4}](PF6)2 and [{Pd(2-C6H4CH2NMe2)}2{-(RP*,SP*)-4}](PF6)2.** Prepared in a similar manner to [{Pd(2-C6H4CH2NMe2)}2(-L)](PF6)2 [where L = (RP*,RP*)- or (RP*,SP*)-**1**] except using **8** (2.18 g, 3.94 mmol) and (RP*,RP*)- and (RP*,SP*)-**4** (1.91 g, 3.94 mmol). The addition of excess aqueous ammonium hexafluorophosphate gave a *ca.* 1:1 diastereomeric mixture of [{Pd(2-C6H4CH2NMe2)}2{-(RP*,RP*)-**4**}](PF6)2 and [{Pd(2-C6H4CH2NMe2)}2{-(RP*,SP*)-**4**}](PF6)2 (4.16 g, 84%). 31P-{1H} NMR [(CD3)2CO]:  38.7 (s, 2 P), 39.0 (s, 2 P). The diastereomeric mixture was dissolved in hot methanol (100 cm3) and the solution allowed to cool to ambient temperature overnight to give fine white needles of [{Pd(2-C6H4CH2NMe2)}2{-(RP*,RP*)-**4**}](PF6)2. The complex was isolated by filtration, washed with methanol (5 cm3) and dried *in vacuo* (1.87 g, 90%), mp 190 C (decomp.). (Found: C, 45.7; H, 4.8; N, 4.5. Calc. for C48H58F12N4P4Pd2: C, 45.9; H, 4.7; N, 4.5%). 1H NMR [(CD3)2CO]:  1.30 (m, 4 H, CC*H*2C), 1.62 (m, 4 H, CC*H*2C), 2.51 (m, 2 H, PC*H*H), 2.81 (m, 2 H, PCH*H*), 2.94 (bs, 6 H, N*Me*), 3.03 (bs, 6 H, N*Me*), 3.81, 4.41 (AB part of ABX m, 4 H, 2*J*AB 14 Hz, 4*J*AX 3 Hz, 4*J*BX ~ 0 Hz, C*H*2NMe2), 6.35-8.08 (m, 30 H, aromatics & N*H*2). 31P-{1H} NMR [(CD3)2CO]:  39.0 (s, 2 P). The mother liquor from the isolation of [{Pd(2-C6H4CH2NMe2)}2{-(RP*,RP*)-**4**}](PF6)2 could not be further separated by fractional crystallization.

**Formation and separation of the internally diastereomeric complexes [SP-4-2-(RP*,RP*)]- and [SP-4-2-(RP*,SP*)]-{-1,3-bis[(2-aminoethyl)phenylphosphino]- propane}{bis[2-(dimethylaminomethyl)phenyl-C1,N]}dipalladium(II) hexafluoro-phosphate-hydrate (1/1), [{Pd(2-C6H4CH2NMe2)}2{-(RP*,RP*)-5}](PF6)2 and [{Pd(2-C6H4CH2NMe2)}2{-(RP*,SP*)-5}](PF6)2.** Prepared in a similar manner to [{Pd(2-C6H4CH2NMe2)}2(-L)](PF6)2 [where L = (RP*,RP*)- or (RP*,SP*)-**1**] except using **8** (13.25 g, 0.0240 mol) and (RP*,RP*)- and (RP*,SP*)-**5** (8.31 g, 0.0240 mol). The addition of excess aqueous ammonium hexafluorophosphate gave a *ca.* 1:1 diastereomeric mixture of [{Pd(2-C6H4CH2NMe2)}2{-(RP*,RP*)-**5**}](PF6)2 and [{Pd(2-C6H4CH2NMe2)}2{-(RP*,SP*)-**5**}](PF6)2 (21.23 g, 79%). 31P-{1H} NMR [(CD3)2CO]:  51.8 (s, 2 P), 52.6 (s, 2 P). The diastereomeric mixture was dissolved in hot methanol (100 cm3) and the volume of the solution reduced by *ca* 50% to give fine white needles of [{Pd(2-C6H4CH2NMe2)}2{-(RP*,RP*)-**5**}](PF6)2. The complex was isolated by filtration, washed with cold methanol (5 cm3) and dried *in vacuo* (10.10 g, 95%), mp 287 C (decomp.). (Found: C, 39.2; H, 4.7; N, 5.3. Calc. for C37H52F12N4P4Pd2.H2O: C, 39.1; H, 4.8, N, 4.9%). 1H NMR [(CD3)2CO]:  2.15 (m, 2 H, CC*H*2C), 2.25 (m, 4 H, PC*H*H), 2.65 (m, 4 H, PCH*H*), 2.87 (bs, 6 H, N*Me*), 2.95 (bs, 6 H, N*Me*), 3.10 (m, 2 H, NC*H*H), 3.25 (m, 2 H, NCH*H*), 3.60, 4.61 (AB part of ABX m, 4 H, 2*J*AB 14 Hz, 4*J*AX 3 Hz, 4*J*BX ~ 0 Hz, C*H*2NMe2), 3.75 (bs, 2 H, NH2), 4.35 (bs, 2 H, NH2), 6.50-8.05 (m, 18 H, aromatics). 31P-{1H} NMR [(CD3)2CO]:  52.6 (s, 2 P). The mother liquor from the isolation of [{Pd(2-C6H4CH2NMe2)}2{-(RP*,RP*)-**5**}](PF6)2 was further reduced in volume to *ca*. 20 cm3 and the solution cooled to 4 C. The resulting white crystals of [{Pd(2-C6H4CH2NMe2)}2{-(RP*,SP*)-**5**}](PF6)2 were collected, washed with cold methanol (5 cm3) and diethyl ether (15 cm3), and dried *in vacuo* (6.96 g, 66%), mp 209 C (decomp.). (Found: C, 39.2; H, 5.2; N, 4.6. Calc. for C37H52F12N4P4Pd2.H2O: C, 39.1; H, 4.8, N, 4.9%). 1H NMR [(CD3)2CO]:  2.14 (m, 2 H, CC*H*2C), 2.34 (m, 4 H, PC*H*H), 2.61 (m, 4 H, PCH*H*), 2.84 (bs, 6 H, N*Me*), 2.89 (bs, 6 H, N*Me*), 3.05 (m, 2 H, NC*H*H), 3.15 (m, 2 H, NCH*H*), 3.69, 4.35 (AB part of ABX m, 4 H, 2*J*AB 14 Hz, 4*J*AX 3 Hz, 4*J*BX ~ 0 Hz, C*H*2NMe2), 3.75 (bs, 2 H, NH2), 4.33 (bs, 2 H, NH2), 6.50-8.05 (m, 18 H, aromatics). 31P-{1H} NMR [(CD3)2CO]:  51.8 (s, 2 P).

**[SP-4-2]-{-1,3-bis[(2-diphenylphosphinophenyl)amino]propane}{bis[2-(dimethylaminomethyl)phenyl-C1,N]}dipalladium(II) hexafluorophosphate, [{Pd(2-C6H4CH2NMe2)}2(-6)](PF6)2.** Prepared in a similar manner to [{Pd(2-C6H4CH2NMe2)}2(-L)](PF6)2 [where L = (RP*,RP*)- or (RP*,SP*)-**1**] except using **8** (0.733 g, 1.33 mmol) and **6** (0.790 g, 1.33 mmol). The addition of excess aqueous ammonium hexafluorophosphate gave an off-white precipitate that was dissolved in acetone (35 cm3) and further treated with aqueous ammonium hexafluorophosphate followed by water to give [{Pd(2-C6H4CH2NMe2)}2(-**6**)](PF6)2 (1.62 g, 91%), mp 229 C (decomp.). (Found: C, 50.0; H, 4.5; N, 4.1. Calc. for C57H60F12N4P4Pd2: C, 50.1; H, 4.4, N, 4.1%). 1H NMR [(CD3)2CO]:  1.98 (m, 2 H, CC*H*2C), 2.91 (bs, 12 H, N*Me*2), 3.58 (m, 4 H, NC*H*2), 4.09 (bs, 4 H, C*H*2NMe2), 6.08-7.01 (m, 38 H, aromatics & NH). 31P-{1H} NMR [(CD3)2CO]:  39.4 (s, 2 P).

**[SP-4-2-(RP*,SP*)]-{-1,3-bis[(2-aminophenyl)phenylphosphino]propane}bis-[dichloropalladium(II)]-hydrochloride (1/1), [(PdCl2)2{-(RP*,SP*)-1}].** Prepared in a similar manner to [(PdCl2)2{-(RP*,RP*)-**1**}] except using [{Pd(2-C6H4CH2NMe2)}2{-(RP*,SP*)-**1**}](PF6)2 (1.76 g, 1.45 mmol) to give yellow crystals of [(PdCl2)2{-(RP*,SP*)-**1**}] (1.12 g, 97%), mp 224 C (decomp.). (Found: C, 39.2; H, 3.8; N, 3.4. Calc. for C27H28Cl4N2P2Pd2.HCl: C, 38.9; H, 3.5, N, 3.4%). 1H NMR [(CD3)2SO]:  1.75 (m, 1 H, CC*H*HC), 2.15 (m, 1 H, CCH*H*C), 2.70 (m, 2 H, PC*H*H), 2.91 (m, 2 H, PCH*H*), 7.41-7.97 (m, 18 H, aromatics & NH2). 31P-{1H} NMR [(CD3)2SO]:  48.5 (s, 2 P).

**[SP-4-2-(RP*,RP*)]-{-1,4-bis[(2-aminophenyl)phenylphosphino]butane}bis-[dichloropalladium(II)]-hydrochloride (1/1), [(PdCl2)2{-(RP*,RP*)-2}].** Prepared in a similar manner to [(PdCl2)2{-(RP*,RP*)-**1**}] except using [{Pd(2-C6H4CH2NMe2)}2{-(RP*,RP*)-**2**}](PF6)2 (3.25 g, 2.60 mmol) to give yellow crystals of [(PdCl2)2{-(RP*,RP*)-**2**}] (2.11 g, 98%), mp 259 C (decomp.). (Found: C, 40.1; H, 4.0; N, 3.3. Calc. for C28H30Cl4N2P2Pd2.HCl: C, 39.7; H, 3.7; N, 3.3%). 1H NMR [(CD3)2SO]:  1.37 (m, 2 H, CC*H*HC), 2.05 (m, 2 H, CCH*H*C), 2.66 (m, 4 H, PC*H*2), 7.42-7.82 (m, 22 H, aromatics & NH2). 31P{1H} NMR [(CD3)2SO]:  51.2 (s, 2 P).

**[SP-4-2-(RP*,SP*)]-{-1,4-bis[(2-aminophenyl)phenylphosphino]butane}bis-[dichloropalladium(II)]-hydrochloride (1/1), [(PdCl2)2{-(RP*,SP*)-2}].** Prepared in a similar manner to [(PdCl2)2{-(RP*,RP*)-**1**}] except using [{Pd(2-C6H4CH2NMe2)}2{-(RP*,SP*)-**2**}](PF6)2 (1.30 g, 1.06 mmol) to give yellow crystals of [(PdCl2)2{-(RP*,SP*)-**2**}] (0.83 g, 97%), mp 271 C (decomp.). (Found: C, 40.0; H, 3.7; N, 3.4. Calc. for C28H30Cl4N2P2Pd2.HCl: C, 39.7; H, 3.7, N, 3.3%). 1H NMR [(CD3)2SO]:  1.48 (m, 2 H, CC*H*HC), 2.02 (m, 2 H, CCH*H*C), 2.65 (m, 4 H, PC*H*2), 7.39-7.84 (m, 22 H, aromatics & NH2). 31P{1H} NMR [(CD3)2SO]:  51.1 (s, 2 P).

**[SP-4-2-(RP*,RP*)]-{-1,5-bis[(2-aminophenyl)phenylphosphino]pentane}bis-[dichloropalladium(II)], [(PdCl2)2{-(RP*,RP*)-3}].** Prepared in a similar manner to [(PdCl2)2{-(RP*,RP*)-**1**}] except using [{Pd(2-C6H4CH2NMe2)}2{-(RP*,RP*)-**3**}](PF6)2 (1.80 g, 1.45 mmol) to give yellow crystals of [(PdCl2)2{-(RP*,RP*)-**3**}] (1.02 g, 97%), mp 161 C (decomp.). 1H NMR [(CD3)2SO]:  1.50 (m, 2 H, CC*H*2C), 1.85 (m, 4 H, CC*H*2C), 2.75 (m, 4 H, PC*H*2), 7.67-8.05 (m, 22 H, aromatics & NH2). 31P{1H} NMR [(CD3)2SO]:  51.2 (s, 2 P).

**[SP-4-2-(RP*,RP*)]-{-1,6-bis[(2-aminophenyl)phenylphosphino]hexane}bis-[dichloropalladium(II)], [(PdCl2)2{-(RP*,RP*)-4}].** Prepared in a similar manner to [(PdCl2)2{-(RP*,RP*)-**1**}] except using [{Pd(2-C6H4CH2NMe2)}2{-(RP*,RP*)-**4**}](PF6)2 (1.50 g, 1.19 mmol) to give yellow crystals of [(PdCl2)2{-(RP*,RP*)-**4**}] (0.95 g, 95%), mp 260 C (decomp.). (Found C, 43.0; H, 4.3; N, 3.3. Calc. for C30H34Cl4N2P2Pd2: C, 42.9; H, 4.1; N, 3.3%). 1H NMR [(CD3)2SO]:  1.41 (m, 4 H, CC*H*2C), 1.81 (m, 4 H, CC*H*2C), 2.58 (m, 4 H, PC*H*2), 7.41-7.81 (m, 22 H, aromatics & NH2). 31P{1H} NMR [(CD3)2SO]:  51.2 (s, 2 P).

**[SP-4-2-(RP*,RP*)]-{-1,3-bis[(2-aminoethyl)phenylphosphino]propane}bis-[dichloropalladium(II)]-hydrochloride (1/3), [(PdCl2)2{-(RP*,RP*)-5}].** Prepared in a similar manner to [(PdCl2)2{-(RP*,RP*)-**1**}] except using [{Pd(2-C6H4CH2NMe2)}2{-(RP*,RP*)-**5**}](PF6)2 (3.95 g, 3.53 mmol) to give yellow crystals of [(PdCl2)2{-(RP*,RP*)-**5**}] (3.09 g, 95%), mp 248 C (decomp.). (Found: C, 28.2; H, 4.0; N, 3.4. Calc. for C19H28Cl4N2P2Pd2.3HCl: C, 28.2; H, 3.8, N, 3.5%). 1H NMR [(CD3)2SO]:  1.85 (m, 1 H, CC*H*HC), 2.27 (m, 1 H, CCH*H*C), 2.70 (m, 4 H, PC*H*2), 2.82 (m, 4 H, PC*H*2), 3.17 (m, 4 H, NC*H*2), 5.45 (bs, 4 H, NH2), 7.56-8.17 (m, 10 H, aromatics). 31P{1H} NMR [(CD3)2SO]:  65.3s, 64.7s, 17.4s,12.2s.

**[SP-4-2-(RP*,SP*)]-{-1,3-bis[(2-aminoethyl)phenylphosphino]propane}bis-[dichloropalladium(II)]-hydrochloride (2/5), [(PdCl2)2{-(RP*,SP*)-5}].** Prepared in a similar manner to [(PdCl2)2{-(RP*,RP*)-**1**}] except using [{Pd(2-C6H4CH2NMe2)}2{-(RP*,SP*)-**5**}](PF6)2 (2.80 g, 2.50 mmol) to give yellow crystals of [(PdCl2)2{-(RP*,SP*)-**5**}] (2.26 g, 98%), mp 258 C (decomp.). (Found: C, 28.8; H, 4.0; N, 3.5. Calc. for C19H28Cl4N2P2Pd2.2.5HCl: C, 28.8; H, 3.9, N, 3.5%). 1H NMR [(CD3)2SO]:  1.90 (m, 1 H, CC*H*HC), 2.28 (m, 1 H, CCH*H*C), 2.70 (m, 4 H, PC*H*2), 2.80 (m, 4 H, PC*H*2), 3.18 (m, 4 H, NC*H*2), 5.32 (bs, 4 H, NH2), 7.40-8.25 (m, 10 H, aromatics). 31P{1H} NMR [(CD3)2SO]:  64.2s, 63.5s, 18.1s, 9.2s.

**[SP-4-2]-{-1,3-bis[(2-diphenylphosphinophenyl)amino]propane}bis[dichloro- palladium(II)]-hydrate (1:2), [(PdCl2)2(-6)].** Prepared in a similar manner to [(PdCl2)2{-(RP*,RP*)-**1**}] except using [{Pd(2-C6H4CH2NMe2)}2(-**6**)](PF6)2 (1.00 g, 0.73 mmol) to give yellow crystals of [(PdCl2)2(-**6**)] (0.65 g, 93%), mp 223 C (decomp.). (Found: C, 47.3; H, 4.2; N, 2.9. Calc. for C39H36Cl4N2P2Pd2.2H2O: C, 47.5; H, 4.1; N, 2.8%). 1H NMR [(CD3)2SO]:  1.55 (m, 2 H, CC*H*2C), 3.03 (m, 2 H, NC*H*H), 3.90 (m, 2 H, NCH*H*), 6.99-8.90 (m, 30 H, NH & aromatics). 31P-{1H} NMR [(CD3)2SO]: 44.4 (s, 1 P), 43.4 (s, 1 P).

**(RP*,SP*)-1,3-bis[(2-aminophenyl)phenylphosphino]propane-hydrate (2/1), (RP*,SP*)-1.** Prepared in a similar manner to (RP*,RP*)-**1** except using [(PdCl2)2{-(RP*,SP*)-**1**}] (3.50 g, 4.39 mmol) to give white crystals of (RP*,SP*)-**1** (1.73 g, 89%), mp 132-134 C. (Found: C, 72.3; H, 6.3; N, 6.0. Calc. for C27H28N2P2.0.5H2O: C, 71.8; H, 6.5, N, 6.2%). 1H NMR (CDCl3):  1.70 (m, 2 H, CC*H*2C), 2.22 (m, 4 H, PC*H*2), 4.12 (bs, 4 H, NH2), 6.60-7.42 (m, 18 H, aromatics). 31P-{1H} NMR (CDCl3):  -35.0 (s, 2 P).

**(RP*,RP*)-1,4-bis[(2-aminophenyl)phenylphosphino]butane, (RP*,RP*)-2.** Prepared in a similar manner to (RP*,RP*)-**1** except using [(PdCl2)2{-(RP*,RP*)-**2**}] (1.70 g, 2.10 mmol) to give white crystals of (RP*,RP*)-**2** (0.81 g, 85%), mp 155-156C. (Found: C, 73.7; H, 7.0; N, 5.8. Calc. for C28H30N2P2: C, 73.7; H, 6.6; N, 6.1%). 1H NMR (CDCl3):  1.59 (m, 4 H, CC*H*2C), 2.03 (m, 4 H, PC*H*2), 4.12 (bs, 4 H, NH2), 6.63-7.36 (m, 18 H, aromatics). 31P-{1H} NMR (CDCl3):  -34.0 (s, 2 P). *m/z*: 456, (M+); 379, (M-C6H5)+; 364, (M-C6H5NH2)+; 256, (M-C6H5PC6H4NH2)+.

**(RP*,RP*)-1,5-bis[(2-aminophenyl)phenylphosphino]pentane, (RP*,RP*)-3.** Prepared in a similar manner to (RP*,RP*)-**1** except using [(PdCl2)2{-(RP*,RP*)-**3**}] (1.02 g, 1.20 mmol) to give white crystals of (RP*,RP*)-**3** (0.24 g, 35%), mp 98-100 C. 1H NMR [(CD3)2CO]:  1.46 (m, 6 H, CC*H*2C), 2.01 (m, 4 H, PC*H*2), 4.38 (bs, 4 H, NH2), 6.63-7.39 (m, 18 H, aromatics). 31P-{1H} NMR [(CD3)2CO]:  -34.7 (s, 2 P).

**(RP*,RP*)-1,6-bis[(2-aminophenyl)phenylphosphino]hexane, (RP*,RP*)-4.** Prepared in a similar manner to (RP*,RP*)-**1** except using [(PdCl2)2{-(RP*,RP*)-**4**}] (0.80 g, 0.953 mmol) to give white crystals of (RP*,RP*)-**4** (0.38 g, 82%), mp 122-124 C. (Found: C, 74.2; H, 7.9; N, 4.6. Calc. for C30H34N2P2: C, 74.4; H, 7.1; N, 5.8%). 1H NMR (CDCl3):  1.42 (m, 8 H, CC*H*2C), 2.00 (m, 4 H, PC*H*2), 4.10 (bs, 4 H, NH2), 6.63-7.40 (m, 18 H, aromatics). 31P-{1H} NMR (CDCl3):  -33.9 (s, 2 P).

**(RP*,RP*)-1,3-bis[(2-aminoethyl)phenylphosphino]propane, (RP*,RP*)-5.** Prepared in a similar manner to (RP*,RP*)-**1** except using [(PdCl2)2{-(RP*,RP*)-**5**}] (2.43 g, 3.47 mmol) to give (RP*,RP*)-**5** as an opaque liquid(1.00 g, 83%). 1H NMR (CD2Cl2):  1.46 (m, 2 H, CC*H*2C), 1.80 (m, 8 H, PC*H*2), 2.72 (m, 4 H, NC*H*2), 1.46 (bs, 4 H, NH2), 7.11-7.47 (m, 10 H, aromatics). 31P-{1H} NMR (CD2Cl2):  -30.8 (s, 2 P).

**(RP*,SP*)-1,3-bis[(2-aminoethyl)phenylphosphino]propane, (RP*,SP*)-5.** Prepared in a similar manner to (RP*,RP*)-**1** except using [(PdCl2)2{-(RP*,SP*)-**5**}] (1.50 g, 2.26 mmol) to give (RP*,SP*)-**5** as an opaque liquid(0.60 g, 87%). 1H NMR (CD2Cl2):  1.46 (m, 2 H, CC*H*2C), 1.79 (m, 8 H, PC*H*2), 2.68 (m, 4 H, NC*H*2), 1.46 (bs, 4 H, NH2), 7.25-7.60 (m, 10 H, aromatics). 31P-{1H} NMR (CD2Cl2):  -30.8 (s, 2 P).

**[SP-4-2-(RP*,SP*)]-{-1,3-bis[(2-aminophenyl)phenylphosphino]propane}bis-[chloromethylplatinum(II)], [(PtClMe)2{-(RP*,SP*)-1}].** Prepared in a similar manner to [(PtClMe)2{-(RP*,RP*)-**1**}] except using (RP*,SP*)-**1** (0.50 g, 1.13 mmol) and [PtClMe(cod)] (0.80 g, 2.26 mmol) to give white crystals of [(PtClMe)2{-(RP*,SP*)-**1**}] (1.06 g, 93%), mp 245 C (decomp.). 1H NMR [(CD3)2SO]:  0.30 (s, 6 H, 2*J*PtH 78 Hz, PtMe), 2.09 (m, 2 H, CC*H*2C), 2.70 (m, 4 H, PC*H*2), 6.50-8.50 (m, 22 H, aromatics & NH2). 31P-{1H} NMR [(CD3)2SO]:  18.6 (s, 2 P, 1*J*PtP 4554 Hz).

**[SP-4-2-(RP,RP)]-{-1,3-bis[(2-aminophenyl)phenylphosphino]propane}bis-[chloromethylplatinum(II)]-hydrate (1/1), [(PtClMe)2{-(RP,RP)-1}].** Prepared in a similar manner to [(PtClMe)2{-(RP*,RP*)-**1**}] except using (SP,SP)-**1** (0.15 g, 0.329 mmol) and [PtClMe(cod)] (0.23 g, 0.658 mmol) to give white crystals of [(PtClMe)2{-(RP,RP)-**1**}] (0.20 g, 72%), mp 243 C (decomp.),  -93 (589 nm, *c* 0.312 g per 100 cm3, CH2Cl2). (Found: C, 36.6; H, 3.3; N, 2.6. Calc. for C29H34Cl2N2P2Pt2.H2O: C, 36.6; H, 3.8; N, 2.9%). 1H & 31P-{1H}NMR: identical to that of [(PtClMe)2{-(RP*,RP*)-**1**}].

**[SP-4-2-(SP,SP)]-{-1,3-bis[(2-aminophenyl)phenylphosphino]propane}bis-[chloromethylplatinum(II)]-tetrahydrofuran (2/1), [(PtClMe)2{-(SP,SP)-1}].** Prepared in a similar manner to [(PtClMe)2{-(RP*,RP*)-**1**}] except using (RP,RP)-**1** (0.17 g, 0.388 mmol) and [PtClMe(cod)] (0.27 g, 0.775 mmol) to give white crystals of [(PtClMe)2{-(SP,SP)-**1**}] (0.27 g, 76%), mp 243 C (decomp.),  +93 (589 nm, *c* 0.312 g per 100 cm3, CH2Cl2). (Found: C, 38.5; H, 3.6; N, 2.9. Calc. for C29H34Cl2N2P2Pt2.0.5C4H8O: C, 38.4; H, 4.0; N, 2.9%). 1H & 31P-{1H}NMR: identical to that of [(PtClMe)2{-(RP*,RP*)-**1**}].

**[SP-4-2-(RP*,RP*)]-{-1,4-bis[(2-aminophenyl)phenylphosphino]butane}bis-[chloromethylplatinum(II)]-hydrate (1/2), [(PtClMe)2{-(RP*,RP*)-2}].** Prepared in a similar manner to [(PtClMe)2{-(RP*,RP*)-**1**}] except using (RP*,RP*)-**2** (0.24 g, 0.528 mmol) and [PtClMe(cod)] (0.37 g, 1.05 mmol) to give white crystals of [(PtClMe)2{-(RP*,RP*)-**2**}] (0.50 g, 100%), mp 222-224 C. (Found: C, 36.8; H, 3.9; N, 2.9. Calc. for C30H36Cl2N2P2Pt2.2H2O: C, 36.6; H, 4.1; N, 2.8%). 1H NMR (CD2Cl2):  0.54 (s, 6 H, 2*J*PtH 76 Hz, PtMe), 1.49 (m, 2 H, CC*H*HC), 1.55 (s, 4 H, H2O), 1.73 (m, 2 H, CCH*H*C), 2.38 (m, 4 H, PC*H*2), 5.72 (bs, 4 H, NH2), 7.09-7.21 (m, 18 H, aromatics). 31P{1H} NMR (CD2Cl2):  19.6 (s, 2 P, 1*J*PtP 4631Hz).

**[SP-4-2-(RP*,RP*)]-{-1,6-bis[(2-aminophenyl)phenylphosphino]hexane}bis-[chloromethylplatinum(II)]-hydrate (1/1), [(PtClMe)2{-(RP*,RP*)-4}].** Prepared in a similar manner to [(PtClMe)2{-(RP*,RP*)-**1**}] except using (RP*,RP*)-**4** (0.25 g, 0.513 mmol) and [PtClMe(cod)] (0.36 g, 1.03 mmol) to give white crystals of [(PtClMe)2{-(RP*,RP*)-**4**}] (0.44 g, 87%), mp 209-210 C. (Found: C, 38.8; H, 4.2; N, 2.8. Calc. for C32H40Cl2N2P2Pt2.H2O: C, 38.7; H, 4.3; N, 2.8%). 1H NMR [(CD3)2SO]:  0.37 (s, 6 H, 2*J*PtH 67 Hz, PtMe); 1.15 (m, 4 H, CC*H*2C), 1.38 (m, 4 H, CC*H*2C), 2.34 (m, 2 H, PC*H*H); 2.63 (m, 2 H, PCH*H*), 6.76 (bs, 4 H, NH2), 7.29-7.92 (m, 18 H, aromatics). 31P{1H} NMR [(CD3)2SO]:  20.9 (s, 2 P, 1*J*PtP 4560 Hz).

**[SP-4-2]-{-1,3-bis[(2-diphenylphosphinophenyl)amino]propane}bis[chloro-methylplatinum(II)]-hydrate (1/3), [(PtClMe)2(-6)].** Prepared in a similar manner to [(PtClMe)2{-(RP*,RP*)-**1**}] except using **6** (0.27 g, 0.461 mmol) and [PtClMe(cod)] (0.33 g, 0.923 mmol) to give white crystals of [(PtClMe)2(-**6**)] (0.49 g, 99%), mp 205 C (decomp.). (Found: C, 43.1; H, 4.0; N, 2.4. Calc. for C41H42Cl2N2P2Pt2.3H2O: C, 43.2; H, 4.2; N, 2.5%). 1H NMR (CD2Cl2):  0.59 (d, 3 H, 2*J*PtH 78 Hz, 3*J*PH 3 Hz, PtMe), 0.64 (d, 3 H, 2*J*PtH 75 Hz, 3*J*PH 3 Hz, PtMe), 1.55 (s, 6 H, H2O), 1.76 (m, 2 H, CC*H*2C), 3.17 (m, 2 H, NC*H*H), 3.83 (m, 2 H, NCH*H*), 7.01-7.89 (m, 30 H, aromatics & NH). 31P-{1H} NMR (CD2Cl2):  19.4 (s, 1 P, 1*J*PtP 4670 Hz), 20.0 (s, 1 P, 1*J*PtP 4696 Hz).

**[SP-4-2]-{-1,2-bis[(2-diphenylphosphinophenyl)amino]ethane}bis[chloro-methylplatinum(II)]-hydrate (1:2), [(PtClMe)2(-7)].** Prepared in a similar manner to [(PtClMe)2{-(RP*,RP*)-**1**}] except using **7** (0.17 g, 0.461 mmol) and [PtClMe(cod)] (0.33 g, 0.923 mmol) to give white crystals of [(PtClMe)2(-**7**)] (0.21 g, 67%), mp 176 C (decomp.). (Found: C, 43.7; H, 4.1; N, 2.5. Calc. for C40H40Cl2N2P2Pt2.H2O: C, 43.4; H, 4.0; N, 2.5%). 1H NMR (CD2Cl2):  0.68 (s, 6 H, 2*J*PtH 75 Hz, PtMe), 2.04 (m, 2 H, NC*H*H), 4.60 (m, 2 H, NCH*H*), 7.26-8.17 (m, 30 H, aromatics & NH). 31P{1H} NMR (CD2Cl2):  19.3 (s, 2 P, 1*J*PtP 4769 Hz).

**[SP-4-2-(RP*,SP*)]-{-1,3-bis[(2-aminophenyl)phenylphosphino]propane}bis-[dichloroplatinum(II)], [(PtCl2)2{-(RP*,SP*)-1}].** Prepared in a similar manner to [(PtCl2)2{-(RP*,RP*)-**1**}] except using [(PtClMe)2{-(RP*,SP*)-**1**}] (0.22 g, 0.236 mmol) to give white crystals of [(PtCl2)2{-(RP*,SP*)-**1**}] (0.20 g, 95%), mp 261 C (decomp.). (Found: C, 33.7; H, 3.4; N, 2.9. Calc. for C27H28Cl4N2P2Pt2: C, 33.3; H, 2.9; N, 2.9%). 1H NMR [(CD3)2SO]:  1.09 (m, 2 H, CC*H*2C), 2.75 (m, 4 H, PC*H*2), 7.20-8.40 (m, 22 H, aromatics & NH2). 31P-{1H} NMR [(CD3)2SO]:  19.7 (s, 2 P, 1*J*PtP 3888 Hz).

**[SP-4-2-(RP*,RP*)]-{-1,4-bis[(2-aminophenyl)phenylphosphino]butane}bis-[dichloroplatinum(II)]-tetrahydrofuran (2/1), [(PtCl2)2{-(RP*,RP*)-2}].** Prepared in a similar manner to [(PtCl2)2{-(RP*,RP*)-**1**}] except using [(PtClMe)2{-(RP*,RP*)-**2**}] (0.19 g, 0.199 mmol) to give white crystals of [(PtCl2)2{-(RP*,RP*)-**2**}] (0.15 g, 78%), mp 261 C (decomp.). (Found: C, 35.4; H, 3.6; N, 2.6. Calc. for C28H30Cl4N2P2Pt2.0.5C4H8O: C, 35.2; H, 3.3; N, 2.7%). 1H NMR [(CD3)2SO]:  1.35 (m, 2 H, CC*H*HC), 1.76 (m, 2 H, THF), 2.00 (m, 2 H, CCH*H*C), 2.55 (m, 2 H, PC*H*H), 2.71 (m, 2 H, PCH*H*), 3.60 (m, 2 H, THF), 7.35-8.25 (m, 22 H, NH2 & aromatics). 31P-{1H} NMR [(CD3)2SO]:  22.0 (s, 2 P, 1*J*PtP 3844 Hz).

**[SP-4-2-(RP*,RP*)]-{-1,6-bis[(2-aminophenyl)phenylphosphino]hexane}bis-[dichloroplatinum(II)]-tetrahydrofuran (2/3), [(PtCl2)2{-(RP*,RP*)-4}].** Prepared in a similar manner to [(PtCl2)2{-(RP*,RP*)-**1**}] except using [(PtClMe)2{-(RP*,RP*)-**4**}] (0.19 g, 0.191 mmol) to give white crystals of [(PtCl2)2{-(RP*,RP*)-**4**}] (0.14 g, 71%), mp 246 C (decomp.). (Found: C, 38.2; H, 4.1; N, 2.4. Calc. for C30H34Cl4N2P2Pt2.1.5C4H8O: C, 38.4; H, 4.1; N, 2.5%). 1H NMR [(CD3)2SO]:  1.24 (m, 2 H, CC*H*2C), 1.38 (m, 6 H, CC*H*2C), 1.77 (m, 6 H, THF), 2.59 (m, 4 H, PC*H*2), 3.61 (m, 6 H, THF), 7.35-8.25 (m, 22 H, NH2 & aromatics). 31P-{1H} NMR [(CD3)2SO]:  21.8 (s, 2 P, 1*J*PtP 3850 Hz).

**[SP-4-2-(RP*,RP*)]-{-1,3-bis[(2-aminoethyl)phenylphosphino]propane}bis-[dichloroplatinum(II)-hydrate (1/4), [(PtCl2)2{-(RP*,RP*)-5}].** To a solution of (RP*,RP*)-**5** (0.16 g, 0.454 mmol) in THF (5 cm3) was added a solution of [PtClMe(cod)] (0.32 g, 0.908 mmol). An excess of hydrochloric acid (10 M, 5 cm3) was added to the resulting solution and the mixture stirred overnight. Water (10 cm3) was added and the solution stirred for 30 min. The resulting white precipitate of [(PtCl2)2{-(RP*,RP*)-**5**}] was collected, washed with diethyl ether (5 cm3) and dried *in vacuo* (0.20 g, 46%), mp 250 C (decomp.). (Found C, 23.8; H, 3.8; N, 2.8. Calc. for C19H28Cl4N2P2Pt2.4H2O: C, 24.0; H, 3.8, N, 2.9%). 1H NMR [(CD3)2SO]:  2.05 (m, 1 H, CC*H*HC), 2.32 (m, 1 H, CCH*H*C), 2.70 (m, 8 H, PC*H*2), 3.50 (m, 4 H, NC*H*2), 5.80 (bs, 4 H, NH2), 7.53-8.20 (m, 10 H, aromatics). 31P-{1H} NMR [(CD3)2SO]:  -6.4bs (1*J*PtP 3402 Hz), 32.2bs (1*J*PtP 3680 Hz).

**[SP-4-2-(RP*,SP*)]-{-1,3-bis[(2-aminoethyl)phenylphosphino]propane}bis-[dichloroplatinum(II)-tetrahydrofuran (2/1), [(PtCl2)2{-(RP*,SP*)-5}].** Prepared in a similar manner to [(PtCl2)2{-(RP*,RP*)-**5**}] except using (RP*,SP*)-**5** (0.24 g, 0.704 mmol) and [PtClMe(cod)] (0.50 g, 1.41 mmol) to give white crystals of [(PtCl2)2{-(RP*,SP*)-**5**}] (0.50 g, 81%), mp 294 C (decomp.). (Found C, 27.8; H, 3.7; N, 3.7. Calc. for C19H28Cl4N2P2Pt20.5C4H8O: C, 27.6; H, 3.5; N, 3.1%). 1H NMR [(CD3)2SO]:  1.76 (m, 2 H, THF), 2.05 (m, 1 H, CC*H*HC), 2.28 (m, 1 H, CCH*H*C), 2.65 (m, 4 H, PC*H*2), 2.84 (m, 4 H, PC*H*2), 3.35 (m, 4 H, NC*H*2), 3.61 (m, 2 H, THF), 5.85 (bs, 4 H, NH2), 7.48-8.33 (m, 10 H, aromatics). 31P-{1H} NMR [(CD3)2SO]:  -8.8bs (1*J*PtP 3360 Hz), 31.2bs (1*J*PtP 3860 Hz).

**[SP-4-2]-{-1,3-bis[(2-diphenylphosphinophenyl)amino]propane}bis[dichloro- platinum(II)]-tetrahydrofuran (1/1), [(PtCl2)2(-6)].** Prepared in a similar manner to [(PtCl2)2{-(RP*,RP*)-**1**}] except using [(PtClMe)2(-**6**)] (0.15 g, 0.139 mmol) to give white crystals of [(PtCl2)2(-**7**)] (0.104 g, 70%), mp 249-250 C (decomp.). (Found C, 43.4; H, 4.1; N, 2.2. Calc. for C39H36Cl4N2P2Pt2.C4H8O: C, 43.1; H, 3.7; N, 2.3%). 1H NMR [(CD3)2SO]:  1.44 (m, 2 H, CC*H*2C), 1.76 (m, 4 H, THF), 3.60 (m, 4 H, THF), 3.64 (m, 4 H, NC*H*2), 7.24-9.35 (m, 30 H, aromatics & NH). 31P-{1H} NMR [(CD3)2SO]:  16.7 (s, 1 P, 1*J*PtP 3912 Hz), 16.2 (s, 1 P, 1*J*PtP 3917 Hz).
